# Supplementary material
Source: HighWire-hosted journal article supplement (https://bmjopen.bmj.com/content/6/4/e011207)
Supplement: inline-supplementary-material-1 [file inline-supplementary-material-1.pdf]

# Supported communication for access and participation

Dr Simon Horton

Supported Communication to Improve Participation in Rehabilitation of people with moderate-severe aphasia after a first stroke: a pilot study (SCIP-R)

# Overview

- Communication / conversation in day-to-day life
- Doing speaking & listening: the speech chain
- Speech, language and communication impairments after stroke
- Supporting communication for people with aphasia
  - Key issues, impact & strategies
    - All about the person
    - The environment
    - Supporting understanding
    - Supporting expression
- Supported communication: resources & skills
- Putting it into practice

# Learning outcomes

- After the *preparatory session* and *practical skills training* you will have
  - Furthered your understanding of the role of communication/conversation in daily life
  - Updated your knowledge of post stroke communication impairments
  - An understanding of the principles & practice of supported communication
  - Developed insights into your own supported communication skills & implementation in practice

# Communication / conversation in day-to-day life

- Central to our lives as social beings
- Making and sustaining relationships
- Expressing and sustaining social identity
  - Language group / dialect / accent
  - Emotional expression, attitude etc
  - Role & identity
  - Status & 'life history'
- Informing others and being informed: messages in / out

# The speech chain...or from here to ear...and back

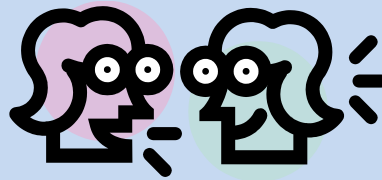

- *Messages out*
  - Selecting words to express meaning
  - Sentences – putting words in order
  - Producing speech – respiration, voice, resonance, articulation
- *Sound waves travel through the air*
- *Messages in*
  - Hearing
  - Auditory perception
  - Comprehension – decoding the speaker's message
  - Interpreting meaning

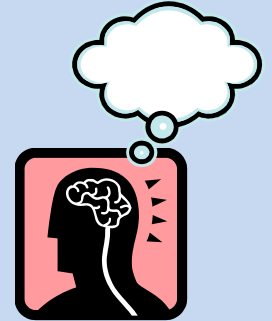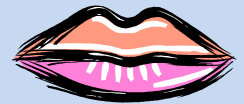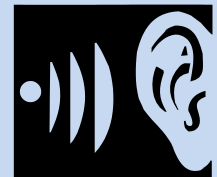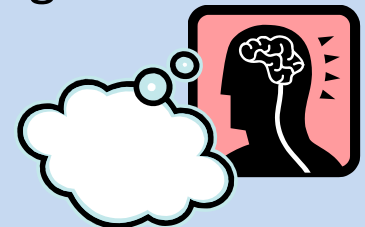

# Conversations are collaborations

- Co-operation in two-party conversations
  - Speaker speaks
  - Listener listens **& shows s/he is listening**
    - The two take turns
- Establishing common ground / mutual understanding
  - Speaker makes sure listener understands
    - A: “I was there a week ago – I mean a week ago this Wednesday...”
    - B: “aha”
  - Listener makes sure s/he has understood
    - A: “I took the dog out for a walk”
    - B: “You mean that old collie of yours?”
    - A: “that’s the one”

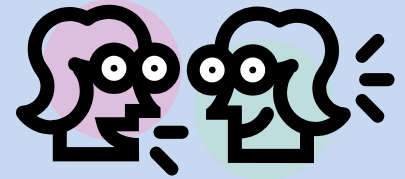

# **‘Speech’ vs ‘language’**

- **‘Speech’**
  - Articulating words – co-ordinated efforts of breathing, voice, tongue, lips etc
- **‘Language’**
  - Symbols representing objects, actions, ideas, emotions, qualities etc
  - Includes all modalities: speaking, listening, writing, reading, gesture (i.e. sign languages)

# Speech, language and communication impairments after stroke

- **Impact of nervous system pathology on**
  - Language
  - Motor control (e.g. voice, articulation, breathing)
  - Cognition, including attention, memory etc
  - Special senses (i.e. vision, hearing)
  - Social communication



# Speech, language and communication impairments after stroke (cont)

- **Aphasia**
  - Many different forms; may affect any modality (i.e. spoken language, writing etc)
  - Certain types may co-occur with apraxia of speech
- **Dysarthria**
  - Different forms according to site of lesion(s) and organs involved
- **Dyspraxia**
  - Oral dyspraxia; apraxia of speech
- **Pragmatic or cognitive communication disorders**
  - Use of speech/language in conversation

# Aphasia: impairments

## Different types according to site/s of lesion

- *Expressive* e.g. Broca's aphasia
  - Word-finding difficulties, but preserved understanding
  - 'Struggles' with forming words e.g. apraxia of speech
- *Receptive* e.g. Wernicke's aphasia
  - Fluent but 'empty' speech; comprehension difficulties; self-monitoring may be poor
  - Severe comprehension difficulties and no / reduced speech output
- *Mixed aphasia*, including difficulties with reading, writing, gesture etc

# People with aphasia may “communicate better than they speak” (Holland, 1977)

- Social ‘rules’ of communication preserved e.g. turn-taking; ‘repairing’ problems; being informative etc
  - Question-Answer; Offer-Acceptance etc
  - Invites completion (of word; of turn etc)
  - Use of word + gesture + intonation
- Use of non-verbal communication e.g.
  - Facial expression
  - (Symbolic) gesture
  - Intonation
  - Vocal non-verbal expression

# Why 'supported communication'?

- Many barriers to access and participation
- Aphasia may mask 'competence'
  - May be hard to see 'the person' / the active mind / the capacity
  - Importance of "I know that you know"
  - A person's decision-making capacity may be questioned / person may be 'excluded' from discussions or decisions
  - A person may be treated as a child
- Competence can be revealed by
  - Awareness of barriers
  - Skilled communication partners

# Communication in context: rehabilitation activities

- Therapy / care activities
  - Case history; assessment; doing therapy etc
- Understanding instructions / explanations
  - What has happened; what this means etc
- Day-to-day choices
  - Menus; comfort (e.g. bed / chair); pain relief etc
- Keeping in touch with people: reducing social isolation
  - Family; friends; staff; other patients
- Key decisions
  - Discharge destination; medication etc
- Family meetings: being meaningfully involved

# All about the person

| Key issues                                                                       | Impact                                                                                                                                                                |
|----------------------------------------------------------------------------------|-----------------------------------------------------------------------------------------------------------------------------------------------------------------------|
| The lived experience not acknowledged: lack of awareness and focus on the person | Feels isolated<br>Validity of experience not acknowledged<br>May not feel valued                                                                                      |
| Having to re-learn many things<br>Abilities not known<br>Not known as a person   | Low confidence & self-esteem<br>May feel 'useless': own competence in doubt / unacknowledged<br>May feel disorientated & uncertain<br>May feel unsupported / left out |
| Feels anxious / frightened<br>Depression / emotional reactions<br>Low mood       | Withdraws / does not want to engage or try things<br>Barrier to participation & progress                                                                              |

# All about the person (cont.)

| Key issues                                                                                      | Impact                                                                                   |
|-------------------------------------------------------------------------------------------------|------------------------------------------------------------------------------------------|
| Feels embarrassed / shy about communication                                                     | Doesn't want to communicate / participate in activities<br>Gives up<br>Becomes withdrawn |
| Cannot communicate feelings, needs, wishes, decisions                                           | Frustration and emotional upset                                                          |
| Not ready to take things 'on board'                                                             | Barrier to participation & fulfilling potential<br>May restrict rehabilitation progress  |
| Individual personal factors e.g. variability in health / well-being; effects of time of day etc | Time and effort for staff to accommodate individual needs                                |

# The lived experience not acknowledged: lack of awareness and focus on the person

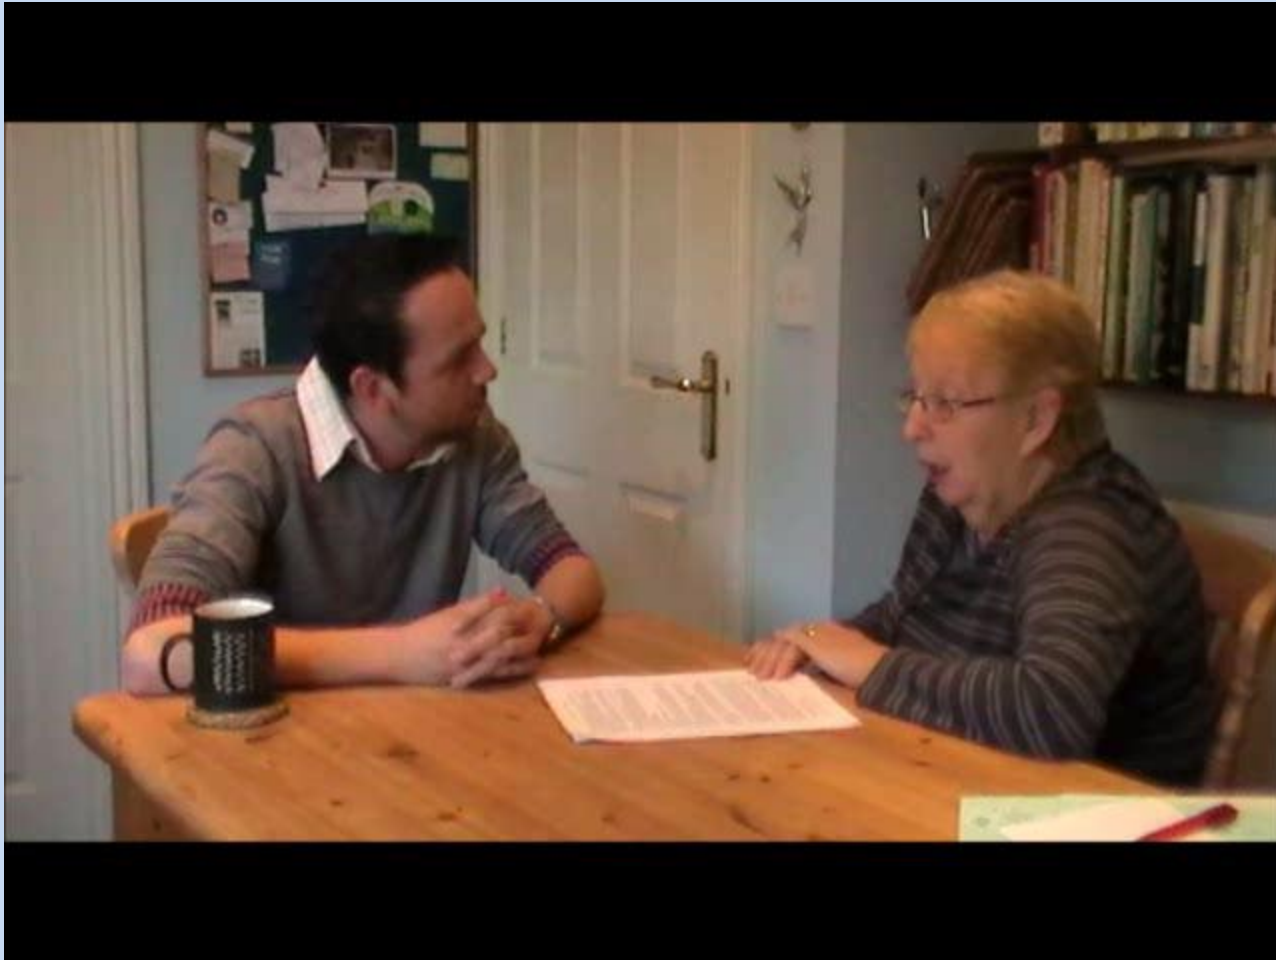



# Acknowledging the person's lived experience

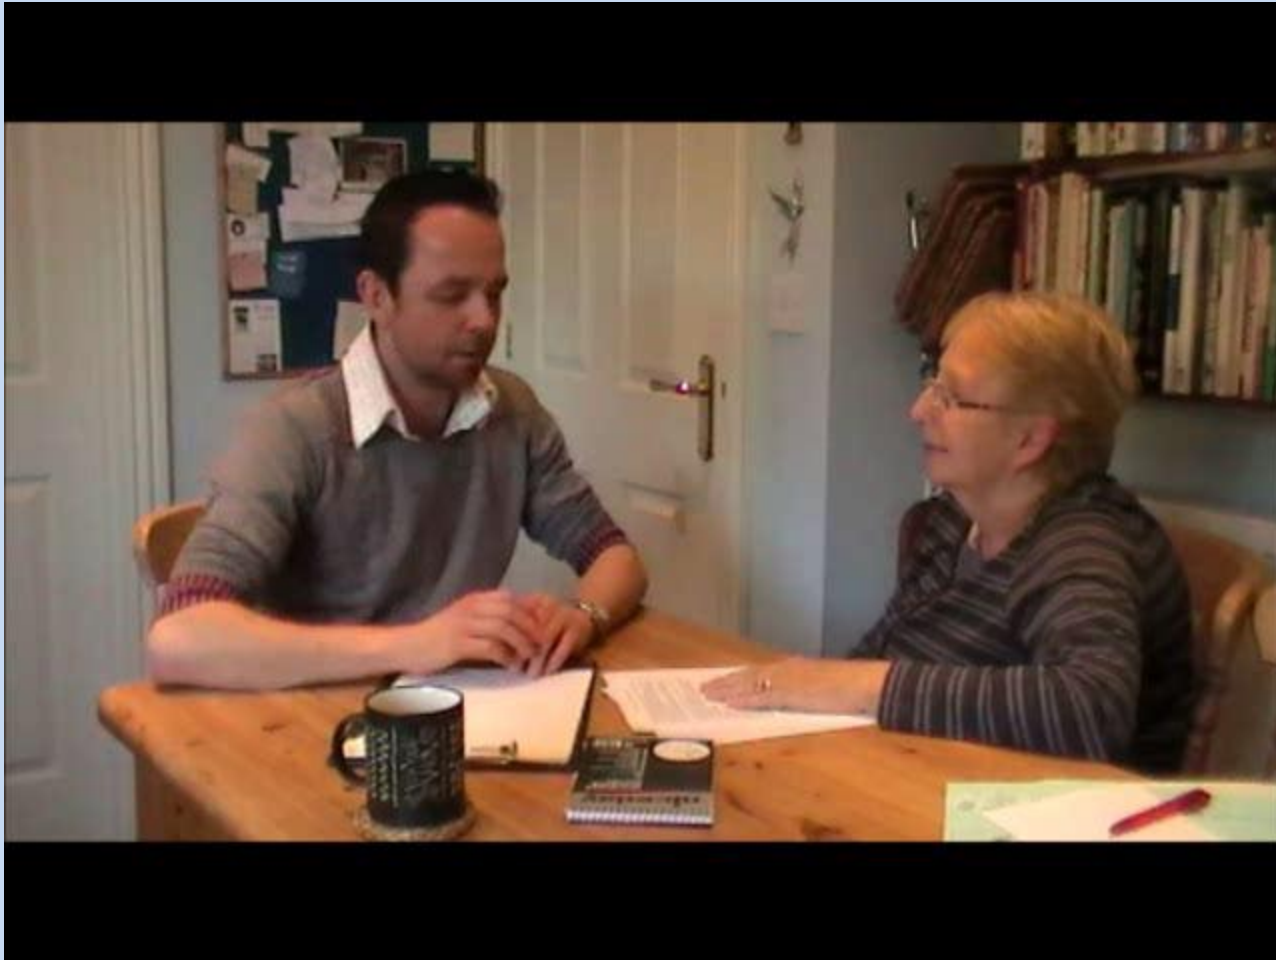

# All about the person: strategies for staff

- “imagine being...”
- Treat the person as trustworthy, interesting and sincere
- Acknowledge the person’s lived experience
  - Empathise: be open to the person’s point of view & show you understand; help people feel included
    - “I understand it must be very confusing / frightening / frustrating etc”
- Take an interest in the person (*‘This is me’*)
  - Get to know them (bit-by-bit) & build a relationship
  - Find out about their abilities / difficulties
  - Learn from the person, colleagues, family etc

# All about the person: strategies for staff (cont.)

- Accommodate individual needs
  - Give people a sense of importance and a feeling of being looked after
  - Attend to the person's environment – be flexible (e.g. 1:1 rather than group; take time out etc)
- Help lift their mood
  - Encourage appropriately: help people to know how to try
  - Help them cope with the present
- Hard for staff “but ten times harder for the person with aphasia”
  - Share the work of communication

# The environment

| Key issues                                                                                                                         | Impact                                                                                                                                       |
|------------------------------------------------------------------------------------------------------------------------------------|----------------------------------------------------------------------------------------------------------------------------------------------|
| Noise <ul style="list-style-type: none"><li>• People talking (too loud)</li><li>• Noise of TV, radio, music, Hoovers etc</li></ul> | Trouble concentrating<br>Trouble understanding / making oneself understood<br>Feeling disorientated<br>Feeling disrespected<br>Feeling angry |
| Being in a 4 – 6 bedded bay                                                                                                        | Staff / patient / relatives chatter<br>Talking about others within earshot<br>Companionship, mutual support, 'modelling'                     |
| Being in a side room                                                                                                               | Isolation                                                                                                                                    |

# Noise, interruption & the mobile

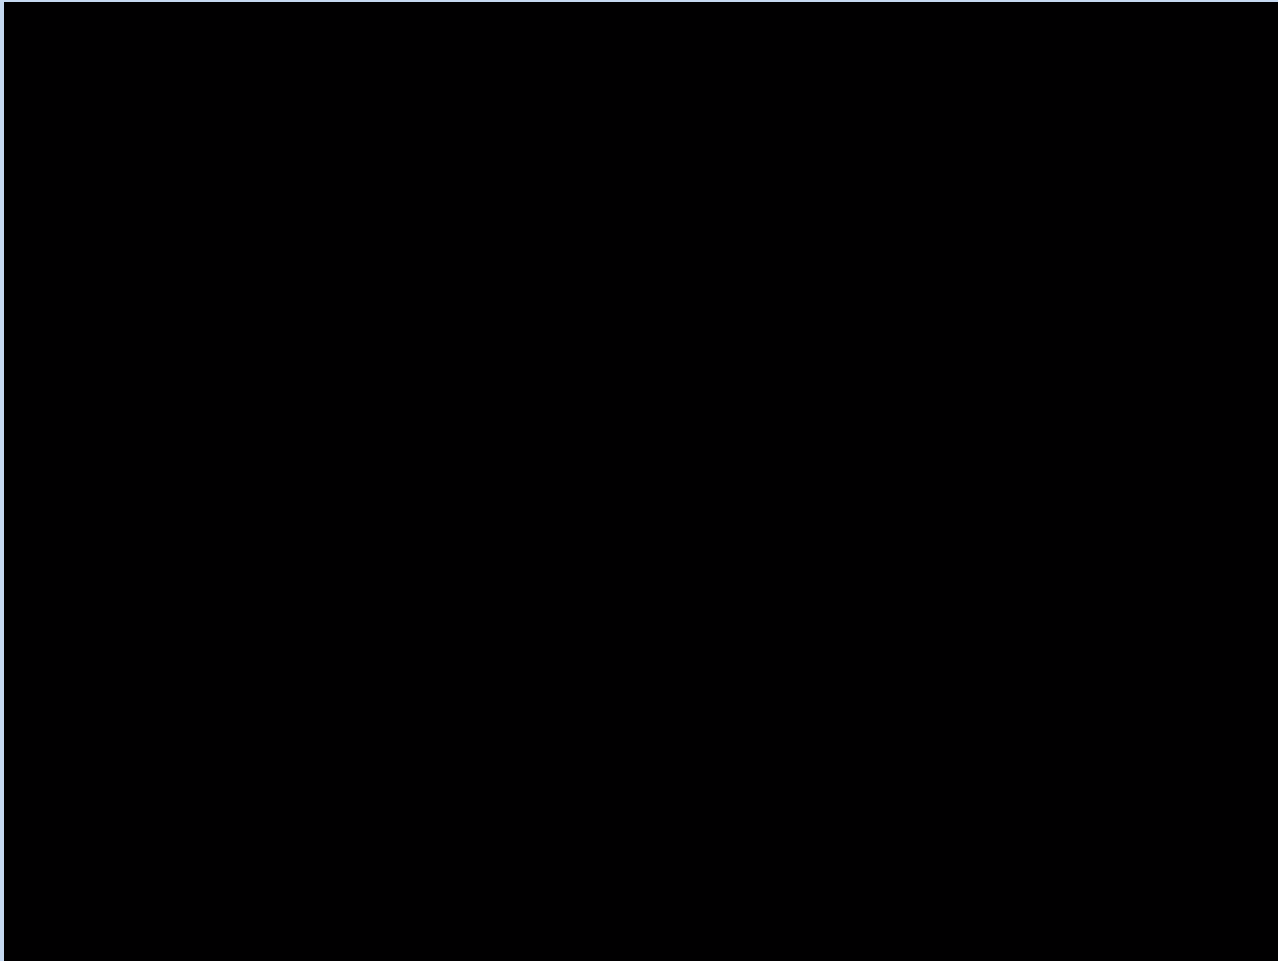

# The environment: strategies for staff

- Be aware; be respectful
- Think about confidentiality
- Turn down the volume / turn it off
- Ask people to be quiet(er)
- Create quiet conditions e.g. 2-3 people in a group
- Go elsewhere e.g. side room; outside etc
- Mutually supportive (group) vs privacy

# Supporting understanding

| Key issues                                                                                                                                                                                       | Impact                                                                                                                                                                                                                                                                                                      |
|--------------------------------------------------------------------------------------------------------------------------------------------------------------------------------------------------|-------------------------------------------------------------------------------------------------------------------------------------------------------------------------------------------------------------------------------------------------------------------------------------------------------------|
| <p>Staff do not know person's level of understanding</p> <p>Trouble understanding</p> <ul style="list-style-type: none"><li>• Activity / questions / statements etc not contextualised</li></ul> | <p>Disempowerment</p> <ul style="list-style-type: none"><li>• Not able to take an active role</li><li>• Not included in decision-making</li></ul> <p>Does not benefit; progress slowed</p> <p>Frustration, disorientation, anxiety</p> <p>Staff unable to help / support – feel frustrated and helpless</p> |
| <p>Lack of focus on the person</p> <p>Talking to others &amp; not the person</p> <ul style="list-style-type: none"><li>• Other staff</li><li>• Family members</li></ul>                          | <p>Person feels excluded / not valued</p> <p>Important issues / information may be missed</p>                                                                                                                                                                                                               |
| <p>Environmental barriers</p> <ul style="list-style-type: none"><li>• Noise, lighting etc</li></ul>                                                                                              | <p>Distraction for person and staff</p>                                                                                                                                                                                                                                                                     |
| <p>Personal barriers</p> <ul style="list-style-type: none"><li>• Pain, discomfort etc</li></ul>                                                                                                  | <p>Person cannot concentrate / engage</p>                                                                                                                                                                                                                                                                   |

# Supporting understanding: strategies for staff

- Get to know the person's strengths and difficulties
  - Ask colleagues; listen / observe; find out what works best
- Use environmental / contextual clues
  - Who are you?
    - Name and role
  - Objects; familiar photos etc
  - Demonstrate / model activity / gesture etc
  - Put into context: “You remember the other day...”



# Supporting understanding: strategies for staff (cont.)

- Concentrate on / address the person
  - Remove / avoid distractions; check source of distraction (e.g. pain, discomfort etc)
  - Eye contact: focus and watch the signs
- Quiet
  - Cut out noise
  - Go to side room; leave the group; 1:1 etc
  - Reduce 'overload'
- Information in manageable chunks
- Always check understanding

# Supporting explanations

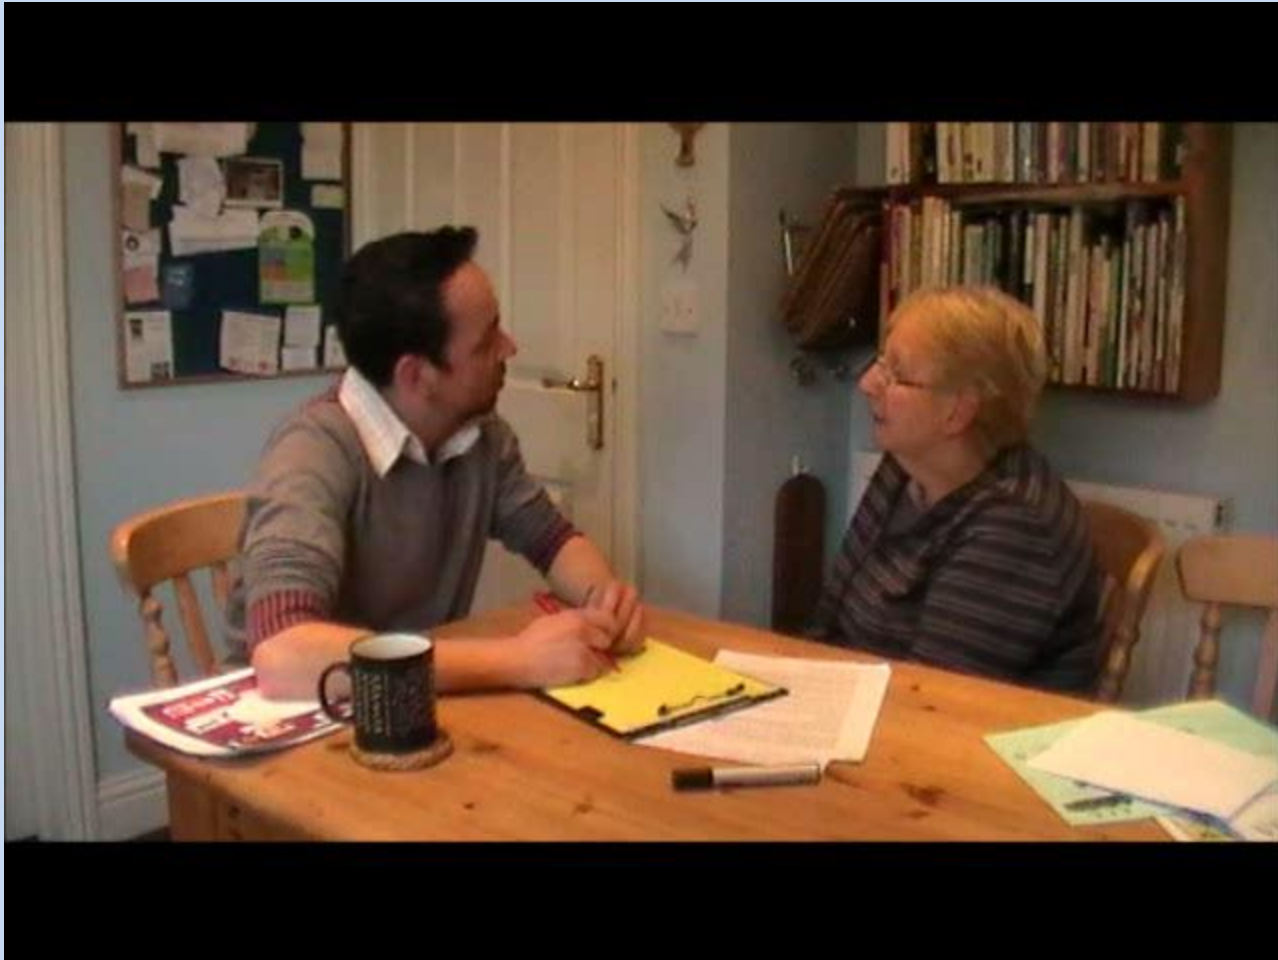

# Supporting expression

| Key issues                                                                                                                                                                 | Impact                                                                                                                |
|----------------------------------------------------------------------------------------------------------------------------------------------------------------------------|-----------------------------------------------------------------------------------------------------------------------|
| Cannot find words / ways to express self<br>Message is not understood / not clear                                                                                          | Person is disempowered / excluded<br>Frustration<br>Staff are anxious / uncertain                                     |
| Not supported <ul style="list-style-type: none"><li>• Unable to finish the message</li><li>• Unable to make use of resources (e.g. pictures; symbols; ABC s etc)</li></ul> | Frustration<br>Lack of participation<br>Distressing for staff and person with aphasia; pictures etc can seem childish |
| Variability / uncertainty <ul style="list-style-type: none"><li>• Yes / no confusion</li><li>• Abilities change from time-to-time</li></ul>                                | Staff uncertainty<br>Person is unable to convey needs, feelings, decisions etc                                        |

# Disempowered and excluded

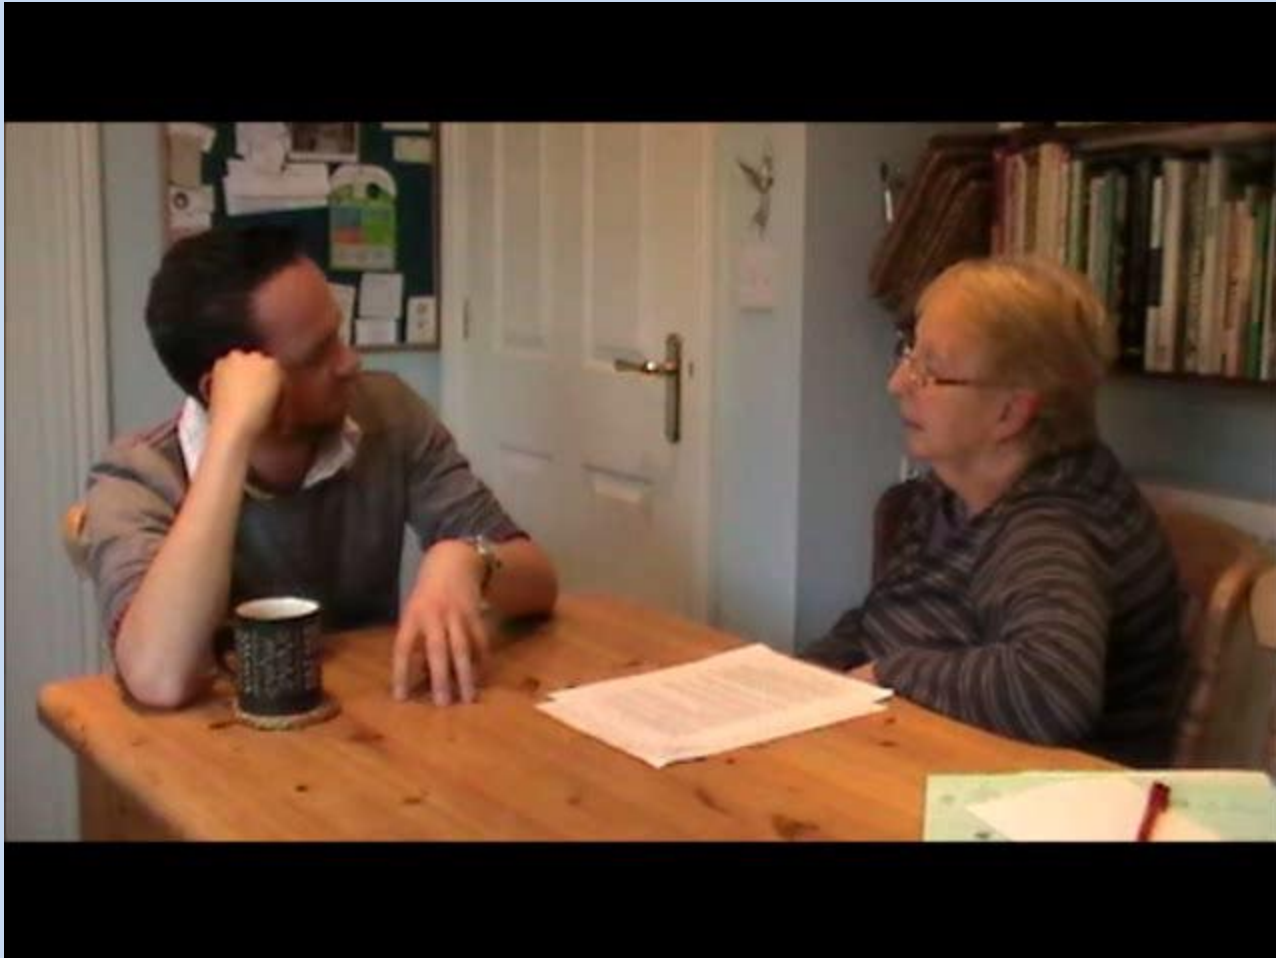

# Supporting expression: strategies for staff

- Acknowledge the difficulty
  - Take / share responsibility – “sorry I’m being so thick...”
  - Take time to keep trying
  - Stay calm / relaxed
  - Persevere: be prepared for trial & error; be prepared to ‘park’ the issue and come back later
  - Importance of arriving at an understanding (rather than ‘correct’ talk)
  - Use humour appropriately
- Don’t make assumptions
  - Establish clear Yes / No
  - Check (but don’t bombard with questions – ask one question at a time)

# Supporting expression: strategies for staff (cont.)

- Create time & space
  - Check for environmental / personal barriers
- Get to know the person's strengths and difficulties
  - Ask colleagues; listen / observe; find out what works best
  - Be responsive to the person's skills
- Provide resources and encourage to use alternative means
  - Always have pen / paper to hand

# Attending, exploring, supporting

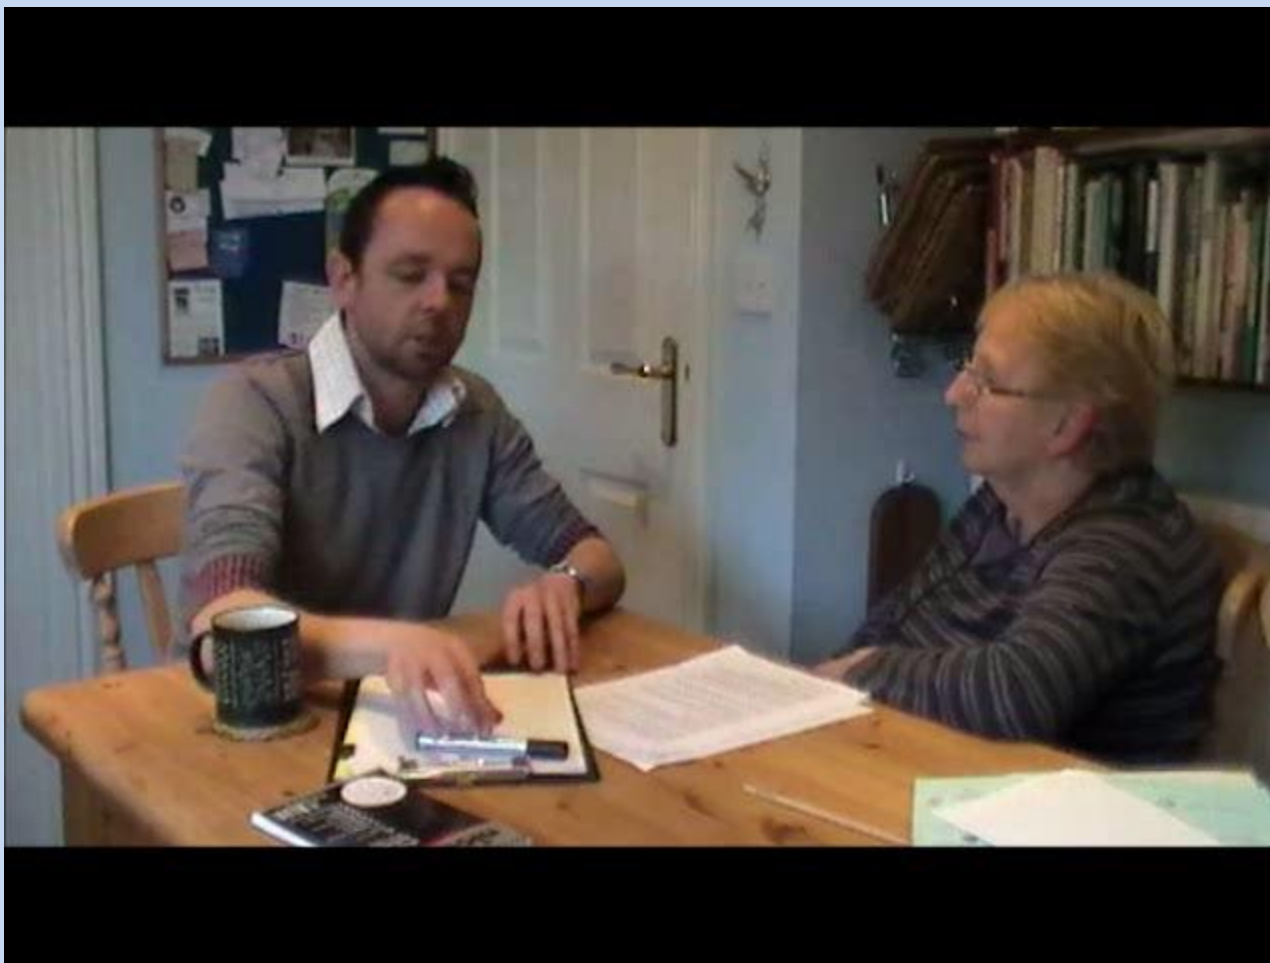

# Resources for supported communication

| Issue                                                    | Resources                                                                                                                                                                                                                                                  |
|----------------------------------------------------------|------------------------------------------------------------------------------------------------------------------------------------------------------------------------------------------------------------------------------------------------------------|
| People with aphasia cannot be rushed                     | <p>Take time – reassure him / her you will take time to listen</p> <p>Come back later</p> <p>Build a trusting relationship: the person feels valued</p>                                                                                                    |
| Words are fleeting / inaccessible                        | <p>Pen &amp; paper – make a record; share use of resources if you can</p>                                                                                                                                                                                  |
| Aphasia is unseen / unacknowledged                       | <p>Stroke &amp; aphasia card</p>                                                                                                                                                                                                                           |
| Not knowing the person or their abilities / difficulties | <p>Family members / colleagues ('champions')</p> <ul style="list-style-type: none"> <li>• Information on biography</li> <li>• Communicative approaches – learn from each other's expertise</li> </ul> <p>Interpret/reassure <u>but not talking for</u></p> |



# Resources for supported communication (cont.)

| Issue                            | Resources                                                                                                                                                                                                                                                     |
|----------------------------------|---------------------------------------------------------------------------------------------------------------------------------------------------------------------------------------------------------------------------------------------------------------|
| Barriers to verbal communication | Objects / photos etc in the immediate environment<br>Pen / paper – writing / drawing<br>Alphabets<br>Pictures; symbols<br>Newspapers, magazines etc<br>Calendars<br>Maps; diagrams<br>Personal items; ' <i>This is me</i> ' – meaningful resources<br>Gesture |
| Environmental barriers           | Plan for interactions / meetings<br>Attend to physical spaces                                                                                                                                                                                                 |

# Skills for supported communication

| Issue                                                                                                                                                                                                                                                      | Skills                                                                                                                                                                                              |
|------------------------------------------------------------------------------------------------------------------------------------------------------------------------------------------------------------------------------------------------------------|-----------------------------------------------------------------------------------------------------------------------------------------------------------------------------------------------------|
| <p>Gaining and focussing attention</p> <ul style="list-style-type: none"><li>• Ensure you fully capitalise on the person's abilities</li></ul>                                                                                                             | <p>Remove distractions (noise etc)</p> <p>Be well positioned</p> <p>Use focussing talk ("OK, now we were going to talk about ....")</p> <p>Signals (facial expression; gesture etc)</p>             |
| <p>Quality of your talk</p> <ul style="list-style-type: none"><li>• Speed of your talk / delivery: too fast for the person to follow</li><li>• Inappropriately loud voice</li><li>• Talks too quickly / mumbles</li><li>• Chatters (distracting)</li></ul> | <p>Slow down your talk</p> <p>Introduce gaps (chunking)</p> <p>One question / statement at a time</p> <p>Give time</p> <p>Focus on the most important thing</p> <p>Don't distract with 'asides'</p> |

# Skills for supported communication (cont.)

| Issue                                                                                                                                                              | Skills                                                                                                                                                                                                                                                                                                                                                                                                                                                                                                          |
|--------------------------------------------------------------------------------------------------------------------------------------------------------------------|-----------------------------------------------------------------------------------------------------------------------------------------------------------------------------------------------------------------------------------------------------------------------------------------------------------------------------------------------------------------------------------------------------------------------------------------------------------------------------------------------------------------|
| <p>Quantity of your talk: giving information</p> <ul style="list-style-type: none"><li>• Too much at a time</li><li>• Too involved / complex / technical</li></ul> | <p>Chunk talk / information – break up with pauses or ‘markers’</p> <p>Check understanding – repeat &amp; rephrase as necessary</p> <p>Be aware of word choice (technical terms; acronyms etc)</p> <p>Show; demonstrate; model</p> <p>Give as many clues as possible</p> <p>Support verbal communication</p> <ul style="list-style-type: none"><li>• Write down (as appropriate); read out / refer back</li><li>• Use diagrams / pictures / communication book etc</li><li>• Use ‘visual punctuation’</li></ul> |

# Skills for supported communication (cont.)

| Issue                                                                                                                                                                                                                  | Skills                                                                                                                                                                                                                                                                                                                                                         |
|------------------------------------------------------------------------------------------------------------------------------------------------------------------------------------------------------------------------|----------------------------------------------------------------------------------------------------------------------------------------------------------------------------------------------------------------------------------------------------------------------------------------------------------------------------------------------------------------|
| <p>Quality of your listening</p> <ul style="list-style-type: none"><li>• Not paying attention or listening carefully – distracted</li><li>• Not attending to the message</li><li>• Not supporting adequately</li></ul> | <p>Give time and (create) opportunity</p> <ul style="list-style-type: none"><li>• Environment</li><li>• Eye contact</li><li>• Observation (non-verbal behaviour – intonation; facial expression etc)</li><li>• Show you are listening</li><li>• Offer a range / combination of strategies – share modes</li><li>• Summary &amp; suggestions (checks)</li></ul> |
| <p>Respectful communication</p> <ul style="list-style-type: none"><li>• Acknowledge difficulties and competence</li><li>• Interpret messages as communicative</li></ul>                                                | <p>Use empathy / person-centeredness</p> <p>Feed back your understanding / interpretation (where there is doubt)</p> <p>Avoid a 'teacherly' manner – accept, don't evaluate</p> <p>Humour as appropriate</p>                                                                                                                                                   |

# Resourceful communication

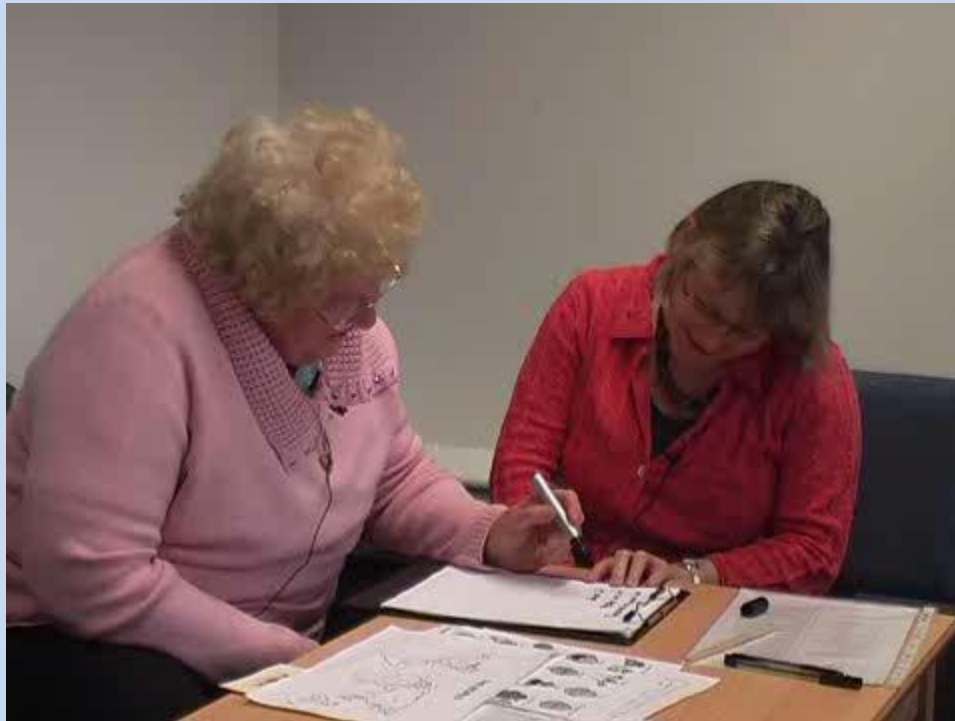

got seven & weeks  
got two weeks  
go ~~away~~

A asks about 'type'  
of word: Yes / No

M crosses out  
written attempt

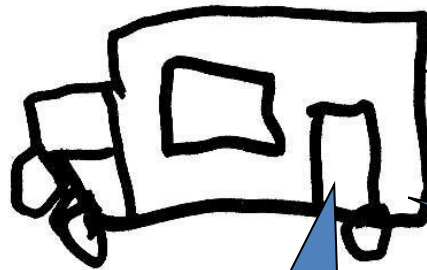

A suggests  
drawing

A suggests  
referent too early -  
rejected

June

M - essential  
features enable  
correct referent to  
be identified

# Practical exercise 1: role play

- In pairs threes, find out / convey biographical information about e.g. yourselves, family, place of birth etc etc
- RULES
  - No speech
  - No writing of words
  - **DRAWING**
  - **NUMBERS**
  - **GESTURE, NVC only**

# Practical exercise 2: face-to-face training

- Each person in 1:1 conversation with communication partner trainers e.g.
  - A is with 1<sup>st</sup> trainer (20 mins) including feedback
  - A is with 2<sup>nd</sup> trainer (20 mins) including feedback
  - etc etc
- Find out about the person e.g. background, history, family, occupation, interests etc
- Tell them about yourself and your role e.g. provide an explanation about something to do with your job; stroke care etc



# Face-to-face training feedback

At the end of the 15 minute session you will be asked to

- **Consider what went well**
  - Use the feedback sheet to discuss Skills and Resources
  - Trainer discusses these points and **emphasises positive aspects**
- **Consider areas to work on**
  - Use the feedback sheet to discuss Skills and Resources
  - Trainer discusses these points and **indicates two key aspects to improve for skills and resources**
- Trainer gives overall score
- Trainee puts 'aspects to work on' into practice in second conversation session

# Resources for day-to-day practice

- On the ward
  - *Handy pack*: key pointers / reminders / basic symbols etc
  - *Learning logs*
    - A monthly reflective record of your experiences using supported communication e.g.
      - Responding to the person
      - Supporting understanding and expression
      - Supporting participation etc
    - Identifying the need for additional support or training

# Bibliography

- Denes PB & Pinson EN (1993) *The Speech Chain* (2<sup>nd</sup> Ed). New York: WH Freeman & Co
- Kagan A (1998) Supported conversation for adults with aphasia: methods and resources for training conversation partners. *Aphasiology*, 12, 9, 816-830
- London Deanery <http://www.faculty.londondeanery.ac.uk/e-learning/feedback>
- Oliver M (1996) *Understanding Disability: from theory to practice*. Macmillan: London
- McVicker S (2007) *The conversation partner toolkit*. London: Connect Press
- Parr *et al* (2004) *The Stroke and Aphasia Handbook*. London: Connect Press
- Pound *et al* (2000) *Beyond Aphasia. Therapies for Living with Communication Disability*. Bicester: Speechmark Publishing Ltd
- Simmons-Mackie N & Kagan A (1999) Communication strategies used by 'good' versus 'poor' speaking partners of individuals with aphasia. *Aphasiology*, 13, 9-11, 807-820
- The Aphasia Institute <http://www.aphasia.ca/training/tips.html> (tips on communicating with a person with aphasia)
