# Supplementary material
Source: HighWire-hosted journal article supplement (https://bmjopen.bmj.com/content/6/4/e011207)
Supplement: inline-supplementary-material-4 [file inline-supplementary-material-4.pdf]

## Supported Communication to Improve Participation in Rehabilitation (SCIP-R)

### Learning log for staff participating in the study

To be completed once a month

#### Purpose

1. To help staff document and reflect on their learning experiences in relation to 'supported communication' skills, patient engagement and participation;
2. To use the documentation for self-assessment and action planning;
3. To monitor the process of implementation and identify the need for staff support (from the Research Team)

#### On average over the last month...

| My experience                                                                     | Examples                                                                                                                  | How I rate my experience<br>(tick one box) |           |               |                      | Your ideas and questions |
|-----------------------------------------------------------------------------------|---------------------------------------------------------------------------------------------------------------------------|--------------------------------------------|-----------|---------------|----------------------|--------------------------|
|                                                                                   |                                                                                                                           | Very confident                             | Confident | Not confident | Not at all confident |                          |
| I am always able to respond naturally and appropriately to patients with aphasia  | Appropriate tone of voice; appropriate loudness; appropriate use of humour                                                |                                            |           |               |                      |                          |
| I am always sensitive in my interactions with patients with aphasia               | Handling unclear talk respectfully; sensitive to aphasic person's attempts; adopting a listening attitude                 |                                            |           |               |                      |                          |
| I am always able to ensure that the person with aphasia understands               | Providing support through short simple sentences; appropriate nonverbal cues                                              |                                            |           |               |                      |                          |
| I am always able to ensure that the person with aphasia has a means of responding | Appropriate question types; providing nonverbal resources; encourage use of gesture / drawing etc; giving time to respond |                                            |           |               |                      |                          |

## Supported Communication to Improve Participation in Rehabilitation (SCIP-R)

| My experience                                                                                                              | Examples                                                                                                                                        | How I rate my experience<br>(tick one box) |           |               |                      | Your ideas and questions |
|----------------------------------------------------------------------------------------------------------------------------|-------------------------------------------------------------------------------------------------------------------------------------------------|--------------------------------------------|-----------|---------------|----------------------|--------------------------|
|                                                                                                                            |                                                                                                                                                 | Very confident                             | Confident | Not confident | Not at all confident |                          |
| I am always able to check and confirm my understanding of the person with aphasia                                          | Asking if you have got it right; reflecting, summarising or expanding                                                                           |                                            |           |               |                      |                          |
| I am always able to help the person with aphasia to be fully and meaningfully involved in care / rehabilitation activities | Adaptations to the environment / communication etc to enable full and meaningful access                                                         |                                            |           |               |                      |                          |
| I am always able to help the person with aphasia communicate their needs, views, opinions or feelings                      | Accessing appropriate resources (e.g. pictures; symbols etc) in order to communicate their needs / wants and make decisions; giving enough time |                                            |           |               |                      |                          |

|                                                              |  |
|--------------------------------------------------------------|--|
| <b>This month the most important thing I experienced was</b> |  |
| <b>The thing I learnt which I can use in the future</b>      |  |

|                                                                                                                                                                                               |           |                               |      |       |        |        |    |
|-----------------------------------------------------------------------------------------------------------------------------------------------------------------------------------------------|-----------|-------------------------------|------|-------|--------|--------|----|
| <b>Please identify the main activity that you undertake:</b> <i>general care / nursing care / therapy / support</i> activities (circle one)                                                   |           |                               |      |       |        |        |    |
| <b>With regard to your above identified main activity</b> has using 'supported communication' changed the amount of time it usually takes to undertake a patient consultation (circle YES/NO) |           |                               |      |       |        | YES    | NO |
| If 'YES' has it (circle one)                                                                                                                                                                  | increased | If so by how much per session | 1min | 5 min | 10 min | 15 min |    |
|                                                                                                                                                                                               | decreased | If so by how much per session | 1min | 5 min | 10 min | 15 min |    |
