# Supplementary material
Source: HighWire-hosted journal article supplement (https://bmjopen.bmj.com/content/6/4/e011207)
Supplement: inline-supplementary-material-5 [file inline-supplementary-material-5.pdf]

# Supporting communication for access and participation

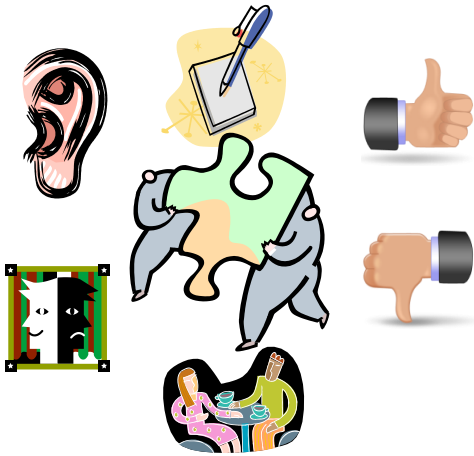

**SCIP-R (Supported Communication to Improve Participation  
in Rehabilitation)**

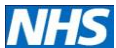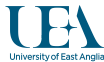

The NHS working in partnership with education:  
Cambridge University Hospitals NHS Foundation Trust | NHS Norfolk |  
Norfolk Community Health & Care NHS Trust

## Supported communication

Aphasia can affect a person's ability to find, put together and say the words they need to express themselves; it can affect their ability to understand the words people say; it may affect their ability to read or write.

The person and their competence may be masked by aphasia, and as a result they face many barriers.

'Supported communication' provides powerful ways of enabling the person with aphasia to communicate.

There are some important principles

- **"I know you know"** – the person is competent to know, think, choose and decide despite speech & language impairments
- **The person without aphasia** can help overcome barriers to communication
- **Collaboration** between speaker and listener / listener and speaker is vital

# Helping the person to understand

**Take your time** and talk at the right speed

Make sure you're **comfortable and relaxed**

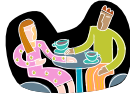

Use **gesture and facial expression**

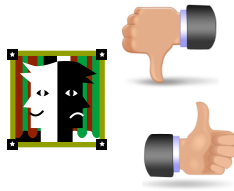

**Write down key words**

**Draw** pictures or diagrams

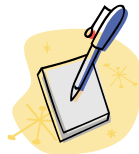

**Show** the person what you mean

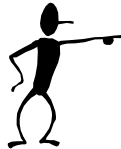

# Helping the person to express themselves

**Pay attention and listen** carefully

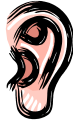

**Check** – ask if you're not clear

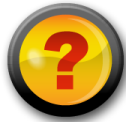

**Ask questions** which help the person

**Share writing and drawing**

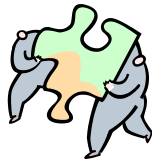

**Encourage the use of props** – pictures, symbols, calendars etc

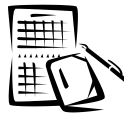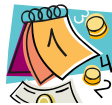

**YES**

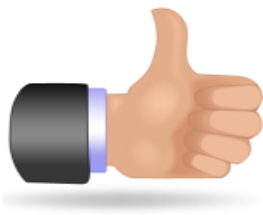

**NO**

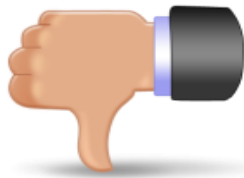

|   |   |   |   |   |   |
|---|---|---|---|---|---|
| A | B | C | D | E | F |
| G | H | I | J | K | L |
| M | N | O | P | Q | R |
| S | T | U | V | W | X |
| Y | Z |   |   |   |   |

|    |    |     |    |    |    |
|----|----|-----|----|----|----|
| 1  | 2  | 3   | 4  | 5  | 6  |
| 7  | 8  | 9   | 10 |    |    |
| 20 | 30 | 40  | 50 | 60 | 70 |
| 80 | 90 | 100 |    |    |    |

## When?

**Monday**      **Tuesday**      **Wednesday**  
**Thursday**      **Friday**      **Saturday**  
**Sunday**

**Morning**      **Lunchtime**  
**Afternoon**      **Night**

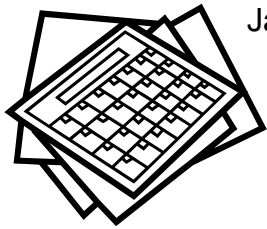

Jan    Feb    March    April    May  
June    July    August    Sept  
October    November    December

**NORFOLK**

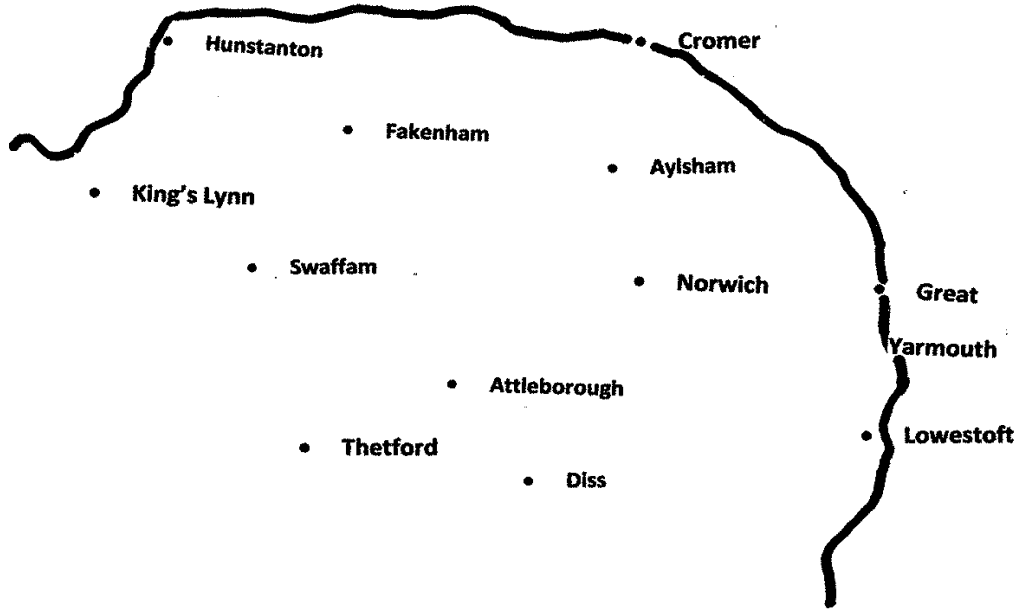

## In your room

Bed

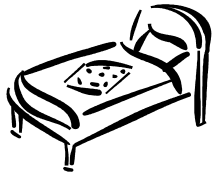

Chair

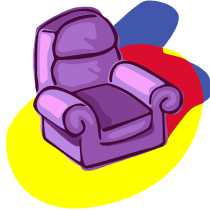

Window

Open  
Closed

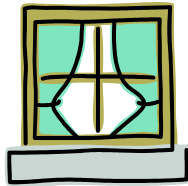

TV

On  
Off

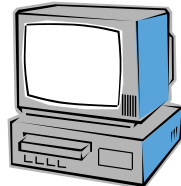

**I'm feeling**

**Hungry**

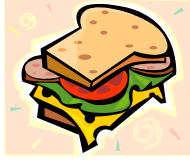

**Thirsty**

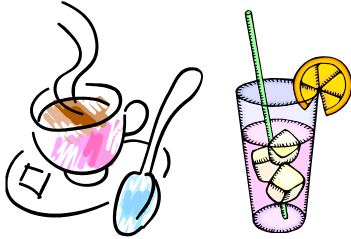

**Pain**

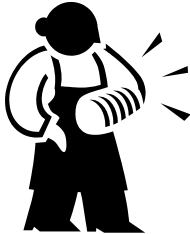

# PAIN

How SEVERE?

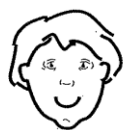

— 0

NO PAIN

1

2

3

4

5

6

7

8

9

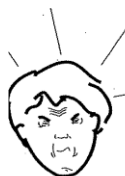

— 10

THE MOST SEVERE PAIN

**I need**

**The toilet**

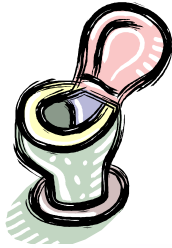

**Commode**

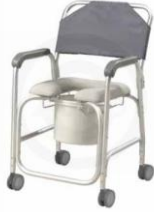

**Bottle**

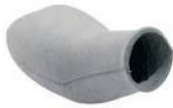

## My family

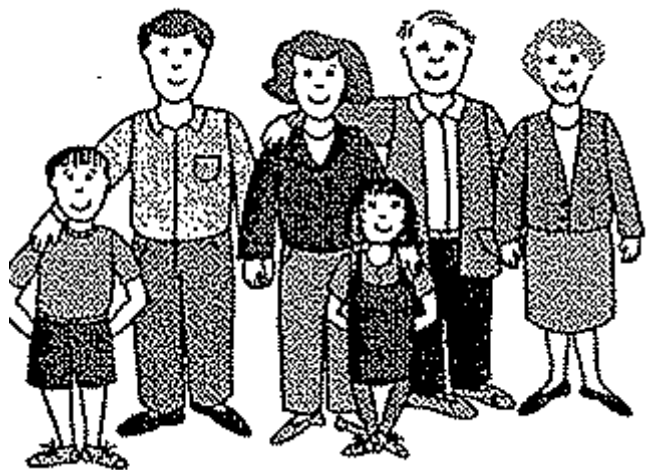

## Staff on the ward

**Doctor**

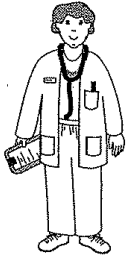

**Speech therapist**

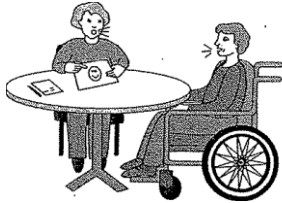

**Physiotherapist**

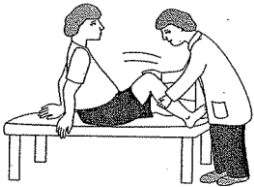

**Occupational therapist**

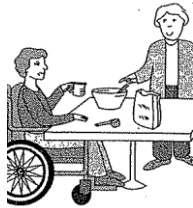

**Nurse**

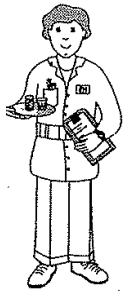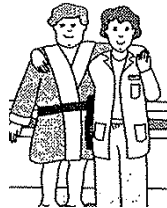

**Healthcare Assistant**

# **‘Learning log’ reminders**

## **Things to reflect on**

**Responding naturally and appropriately**

**Sensitive in interactions**

**Ensuring patients understand**

**Ensuring patients have a means of  
expressing themselves**

**Checking and confirming your  
understanding**

**Involving the person with aphasia**

**Finding ways of helping the patient  
to communicate needs, views and feelings**
