# Supplementary material
Source: HighWire-hosted journal article supplement (https://bmjopen.bmj.com/content/6/4/e011207)
Supplement: inline-supplementary-material-6 [file inline-supplementary-material-6.pdf]

## **Supplementary file 6**

YouTube video dissemination (NIHR new media competition)

Supporting communication for access and participation: a video raising awareness of research into supported communication for stroke and aphasia, with input from researchers and stroke survivors with aphasia. Actors are playing members of the stroke rehabilitation team.

[https://www.youtube.com/watch?v=rCe8r\\_OZDj4&feature=em-upload\\_owner#action=share](https://www.youtube.com/watch?v=rCe8r_OZDj4&feature=em-upload_owner#action=share)
